# Supplementary material for: Synergistic interactions of cytarabine-adavosertib in leukemic cell lines proliferation and metabolomic endpoints
Source: PubMed Central journal article supplement (PMC10530627; doi:10.1016/j.biopha.2023.115352), 2023-08-24

**A**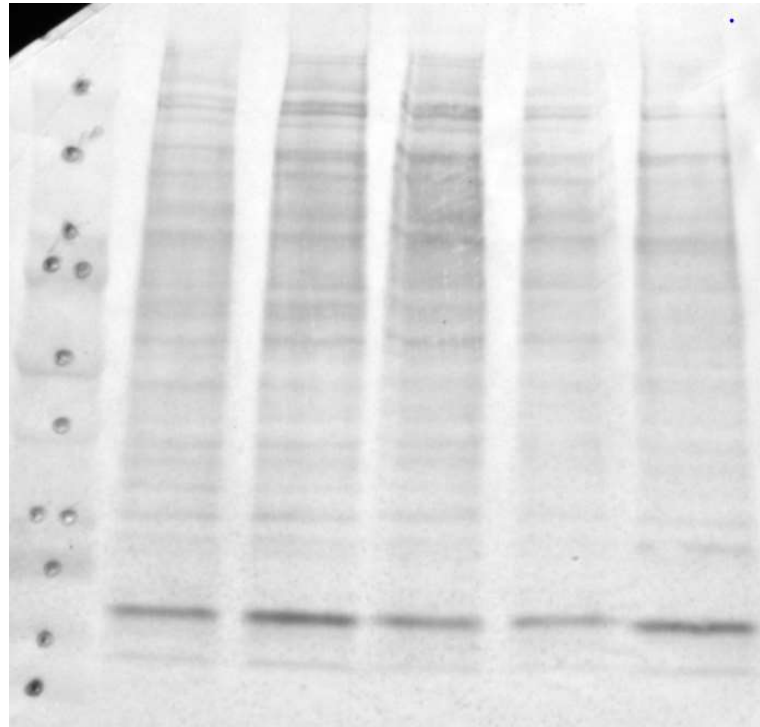

MW 1 2 3 4 5  
markers

**B**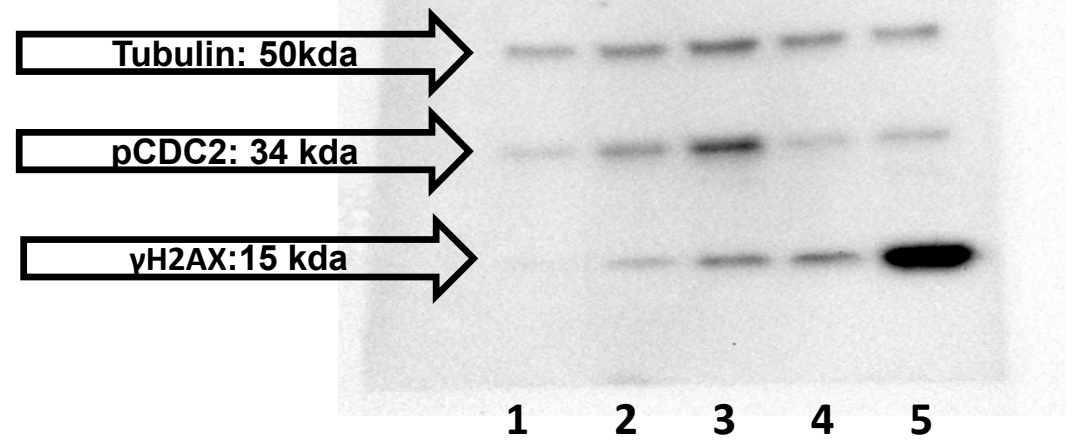

Supplement: NIHMS1931056-supplement-2.pdf [file NIHMS1931056-supplement-2.pdf]
