# Supplementary material for: Synergistic interactions of cytarabine-adavosertib in leukemic cell lines proliferation and metabolomic endpoints
Source: PubMed Central journal article supplement (PMC10530627; doi:10.1016/j.biopha.2023.115352), 2023-08-24

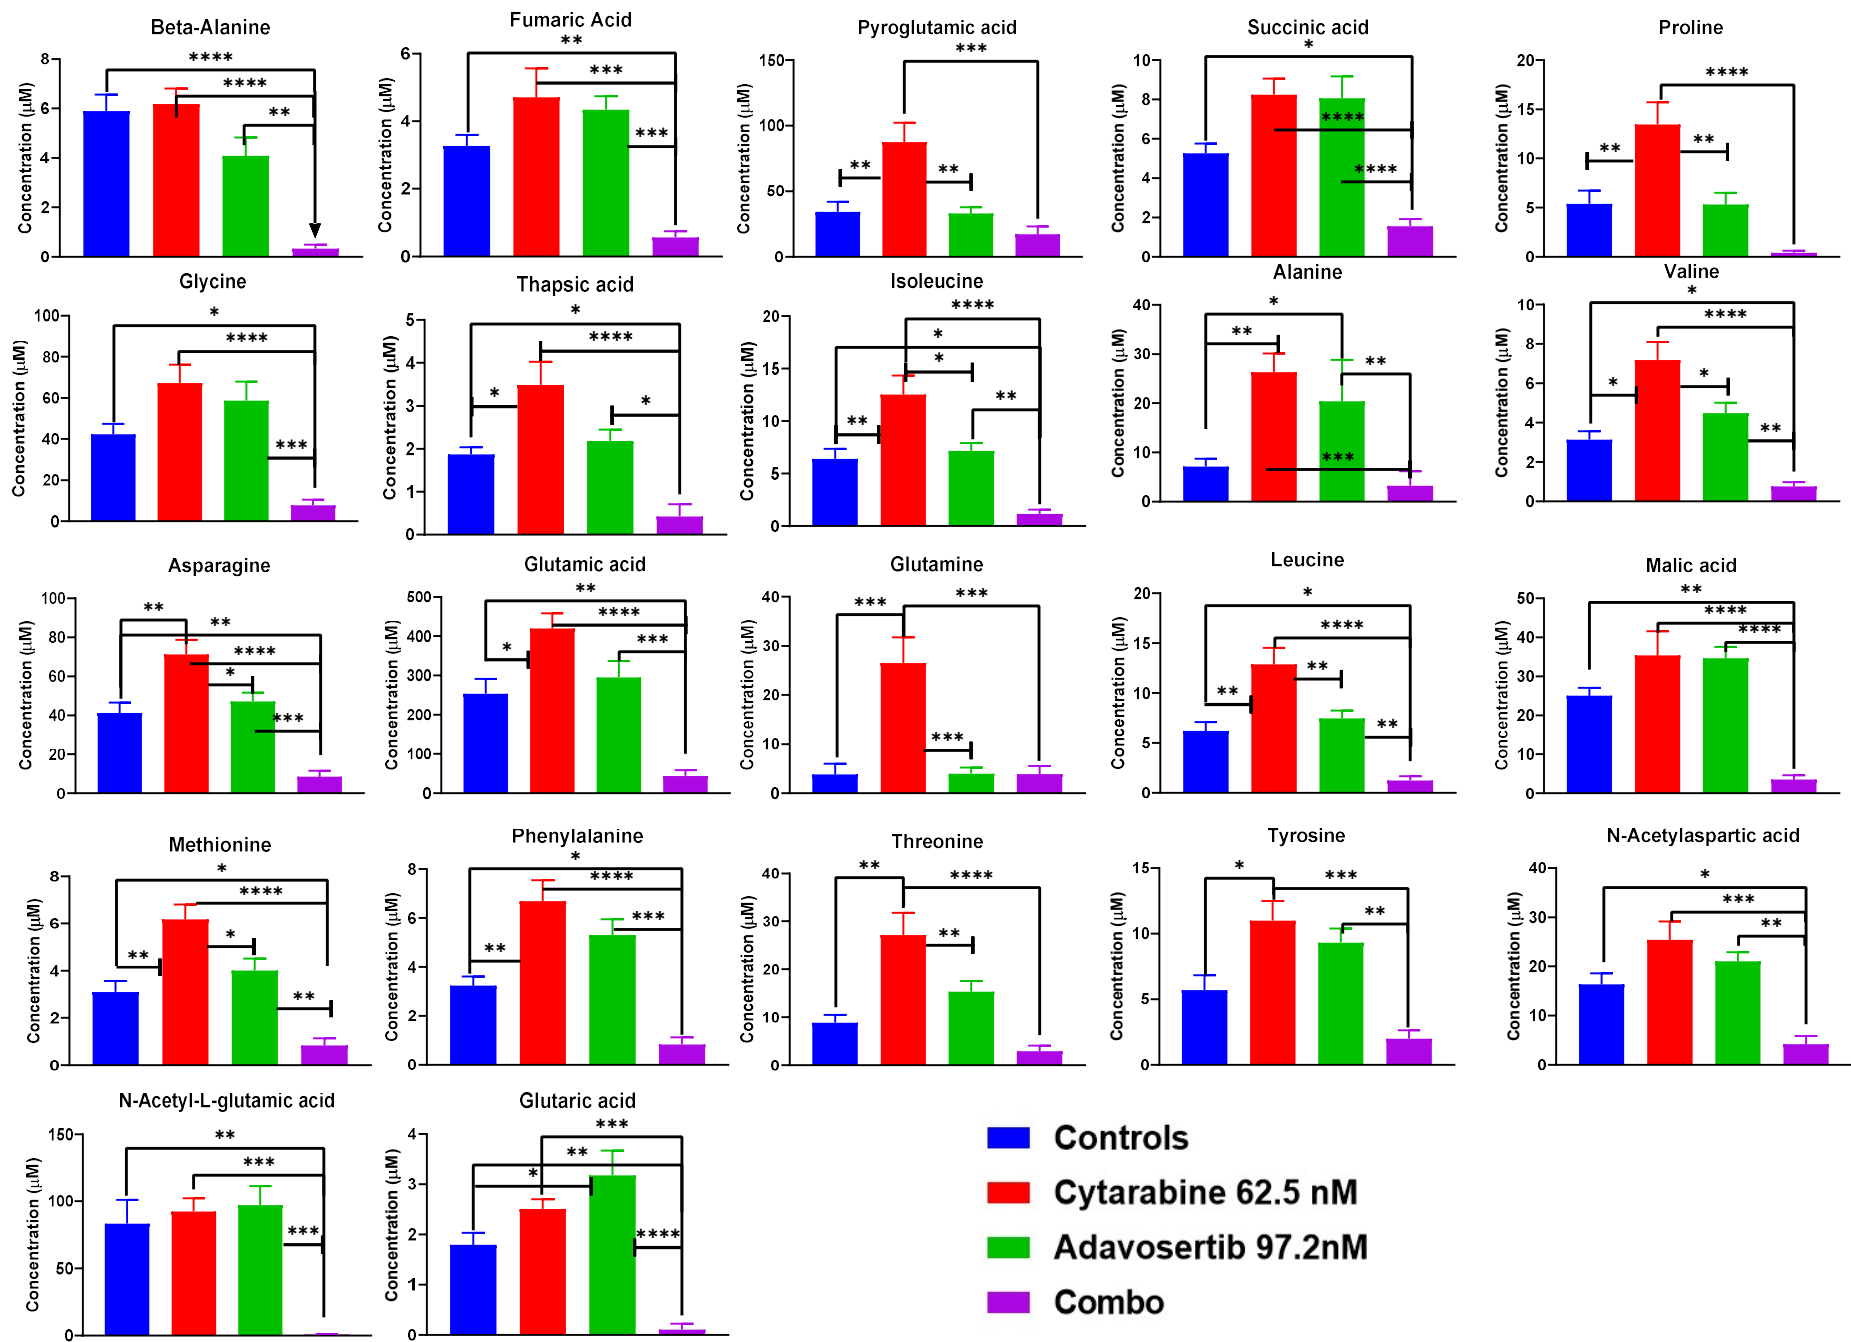

Supplement: NIHMS1931056-supplement-3.pdf [file NIHMS1931056-supplement-3.pdf]
